# Supplementary material for: Determination of chlorine in Hf precursors by high-resolution inductively coupled plasma mass spectrometry
Source: Royal Society of Chemistry journal article supplement (doi:10.1039/d3ja00110e), 2023-01-01

Electronic Supplementary Information for JAAS publication

### Determination of chlorine in Hf precursors measured by high-resolution inductively coupled plasma mass spectrometry

Hanul Lee <sup>a,b</sup>, Seongkyong Joo <sup>a,b</sup> and Dongchul Suh <sup>\*a</sup>

<sup>a</sup> Department of Chemical Engineering, Hoseo University, Asan, Republic of Korea.

<sup>b</sup> JKC Corporation, Cheonan, Republic of Korea.

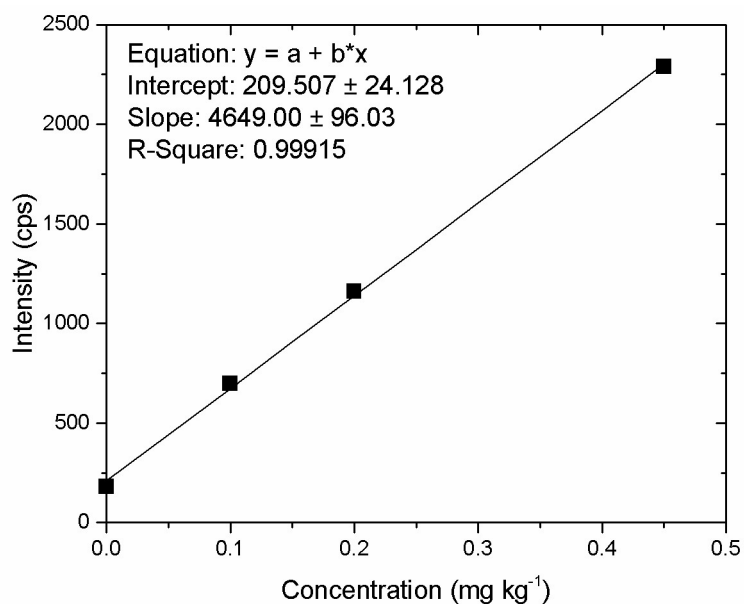

Figure S1 ICP-OES calibration curve using 10 mg kg<sup>-1</sup> Hf CRM.

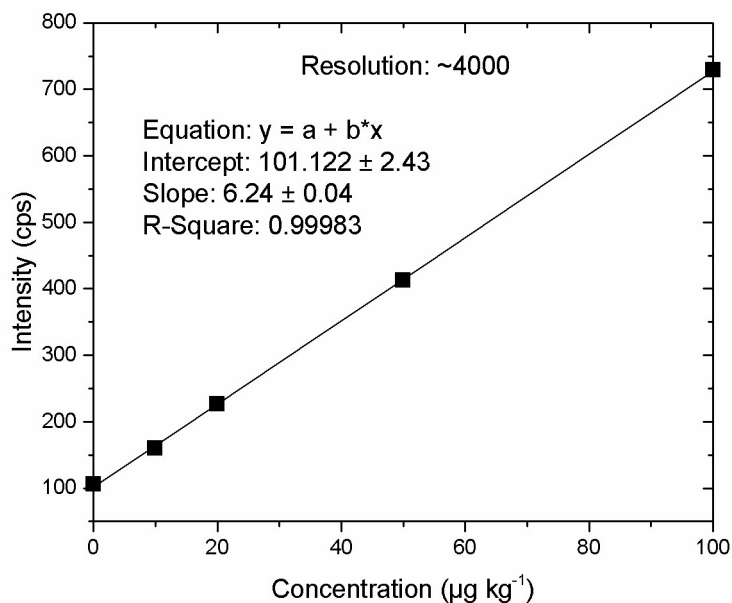

Figure S2 Calibration curve of <sup>35</sup>Cl ion from trichlorophenol in NMP.



Figure S3 Hf deposition on cones and orifice clogging (standard addition method).

ordinary cone

Hf 2100 mg kg<sup>-1</sup>

Hf 21000 mg kg<sup>-1</sup>

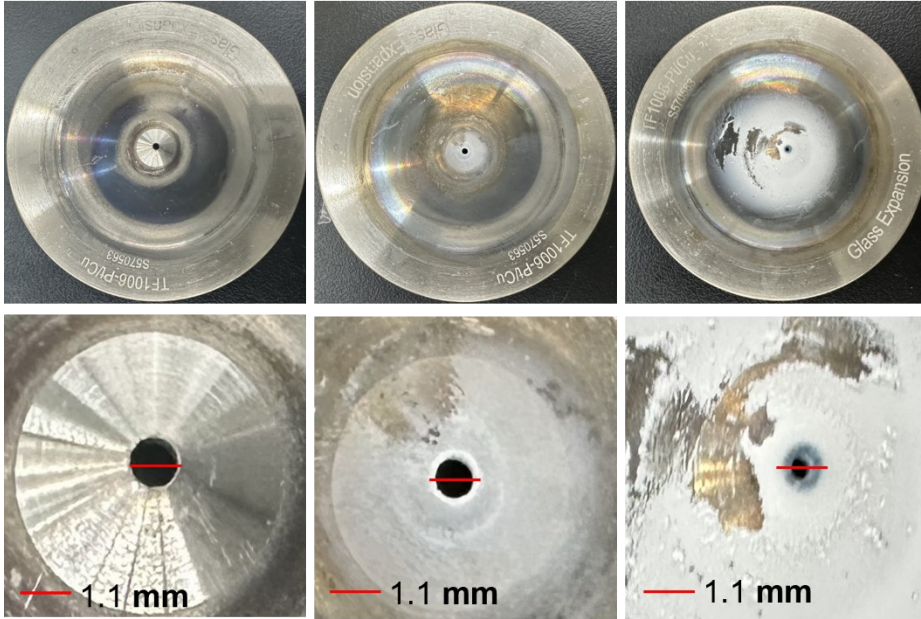

Supplement: d3ja00110e1.pdf [file d3ja00110e1.pdf]
